# Supplementary material
Source: PubMed Central journal article supplement (PMC5364452)
Supplement: oc6b00356_si_001.pdf [file oc6b00356_si_001.pdf]

# SUPPORTING INFORMATION: SYNTHESIS AND CHARACTERIZATION OF THE ACTINIUM AQUO ION

Maryline G. Ferrier,<sup>1</sup> Benjamin W. Stein,<sup>1</sup> Enrique R. Batista,<sup>1\*</sup> John M. Berg,<sup>1</sup> Eva R. Birnbaum,<sup>1</sup> Jonathan W. Engle,<sup>1,2</sup> Kevin D. John,<sup>1</sup> Stosh A. Kozimor,<sup>1\*</sup> Juan S. Lezama Pacheco,<sup>3</sup> Lindsay N. Redman<sup>1</sup>

<sup>1</sup> Los Alamos National Laboratory, Los Alamos, New Mexico 87545, United States of America

<sup>2</sup> University of Wisconsin, Madison, Wisconsin 53711, United States of America

<sup>3</sup> Stanford University, Stanford, California 94305, United States of America

\* To whom correspondence should be addressed, [erb@lanl.gov](mailto:erb@lanl.gov), [stosh@lanl.gov](mailto:stosh@lanl.gov)

LA-UR-16-28891

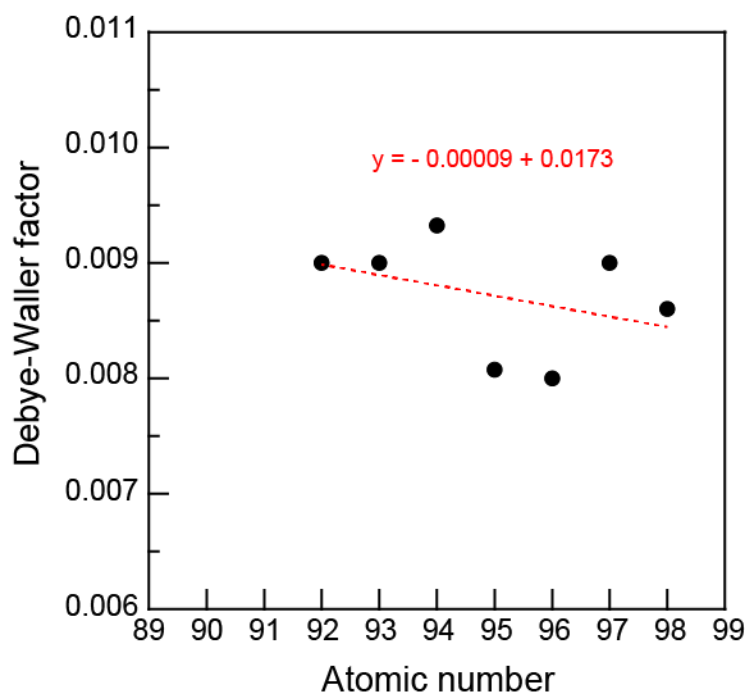

**Figure S1.** The averaged Debye-Waller factors plotted against the corresponding atomic numbers for the actinide aquo ions shown in Table 1 of the main text. This data was used to estimate a realistic Debye-Waller Factor for the actinium aquo ion.
